# Supplementary material
Source: PubMed Central journal article supplement (PMC3872189)
Supplement: 1a338a5980183d0f1ab9e0c59b73986b_genetics.113.157172-6.pdf [file 1a338a5980183d0f1ab9e0c59b73986b_genetics.113.157172-6.pdf]

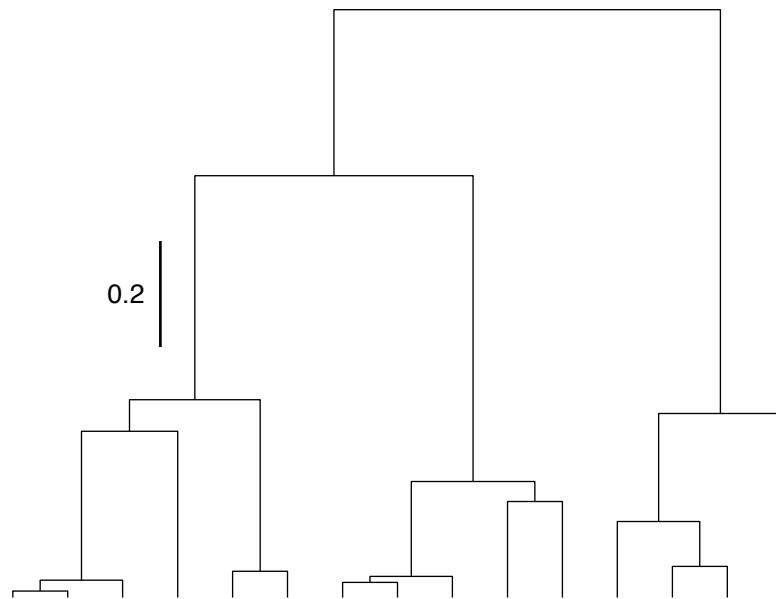

**Figure S4.** Clonal genealogy simulated under the coalescent and used for the application on simulated data.
