# Supplementary material
Source: PubMed Central journal article supplement (PMC3872189)
Supplement: 8efd3801415f76046586a0393b9bb791_genetics.113.157172-11.pdf [file 8efd3801415f76046586a0393b9bb791_genetics.113.157172-11.pdf]

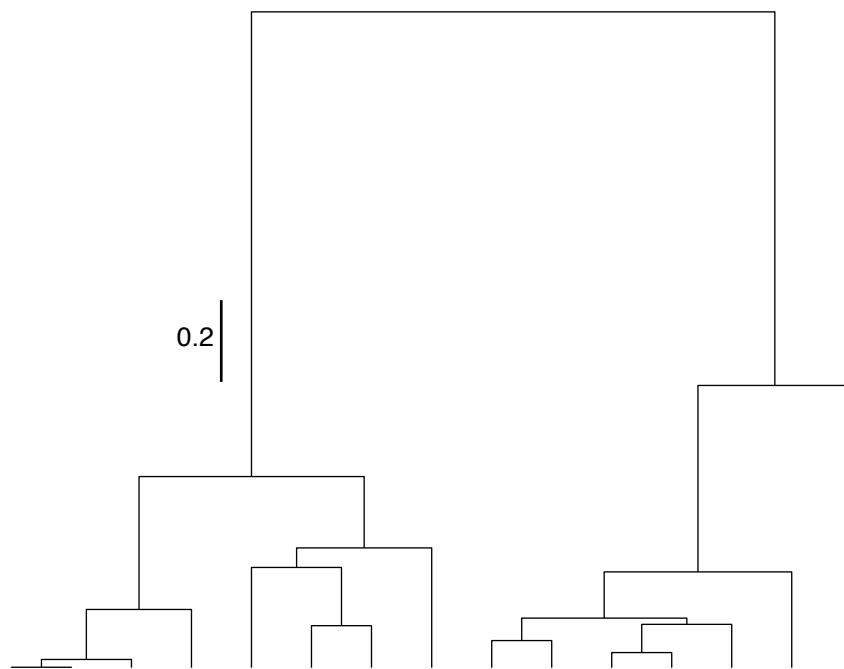

**Figure S1.** Clonal genealogy simulated under the coalescent and used for Figure 3.

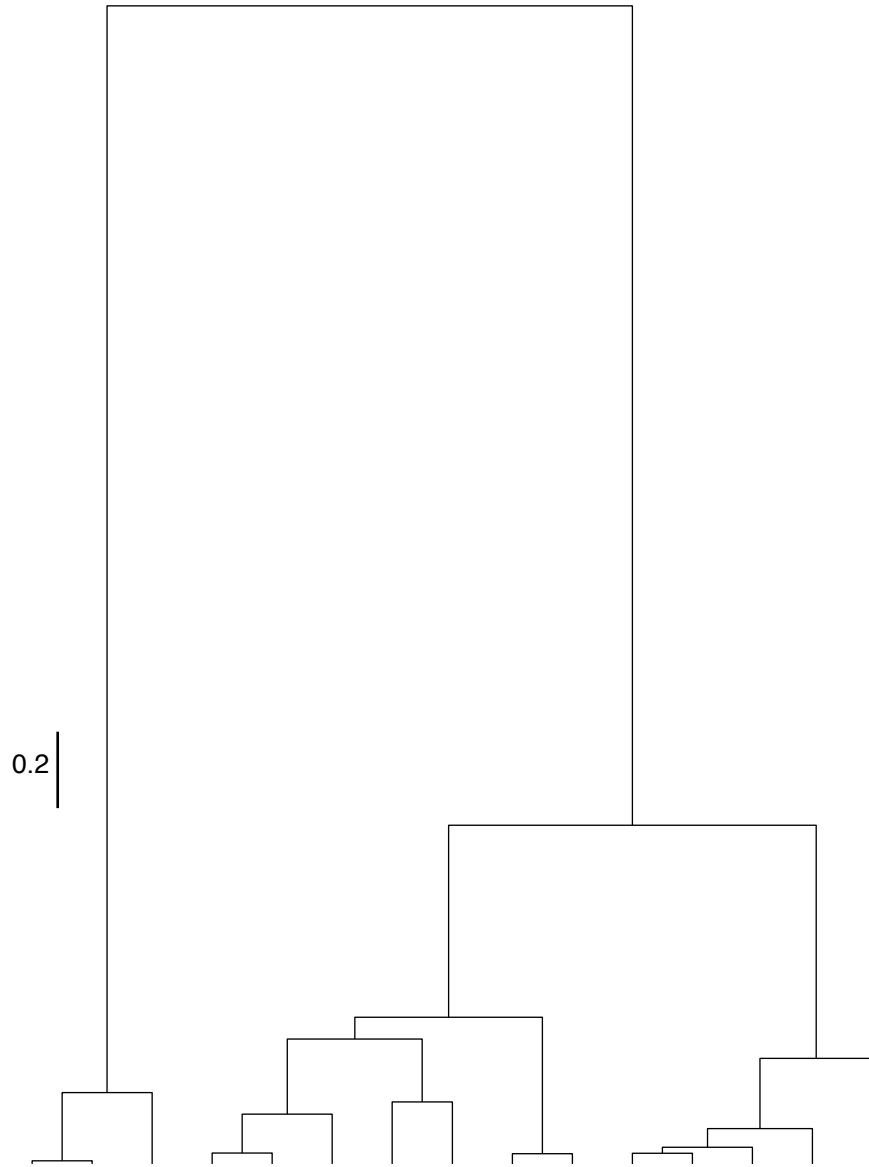

**Figure S2.** Clonal genealogy simulated under the coalescent and used for Figure S3.

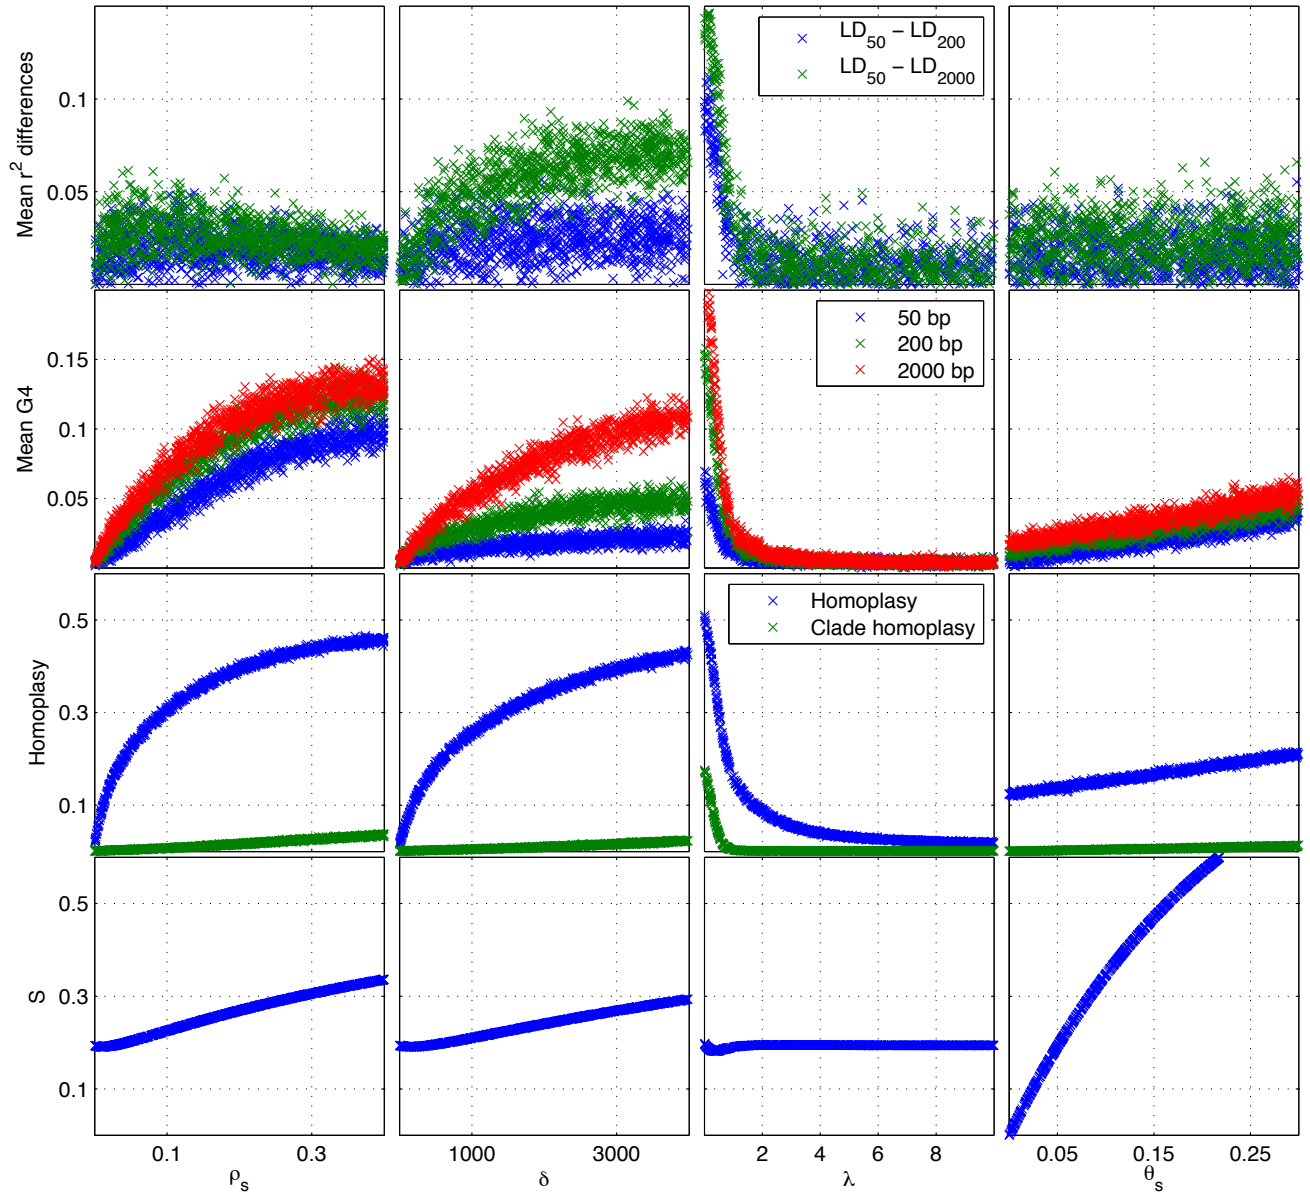

**Figure S3.** Relationship between the summary statistics and model parameters when simulating using the clonal genealogy in Figure S2.

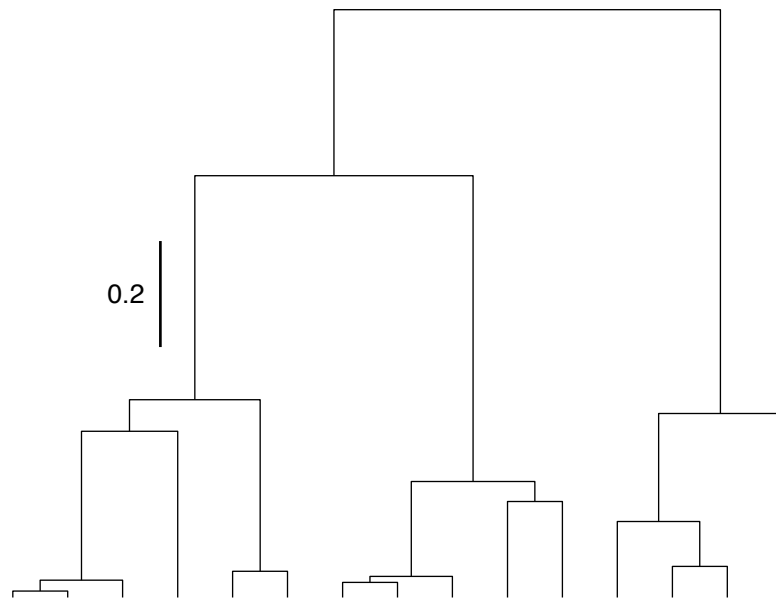

**Figure S4.** Clonal genealogy simulated under the coalescent and used for the application on simulated data.

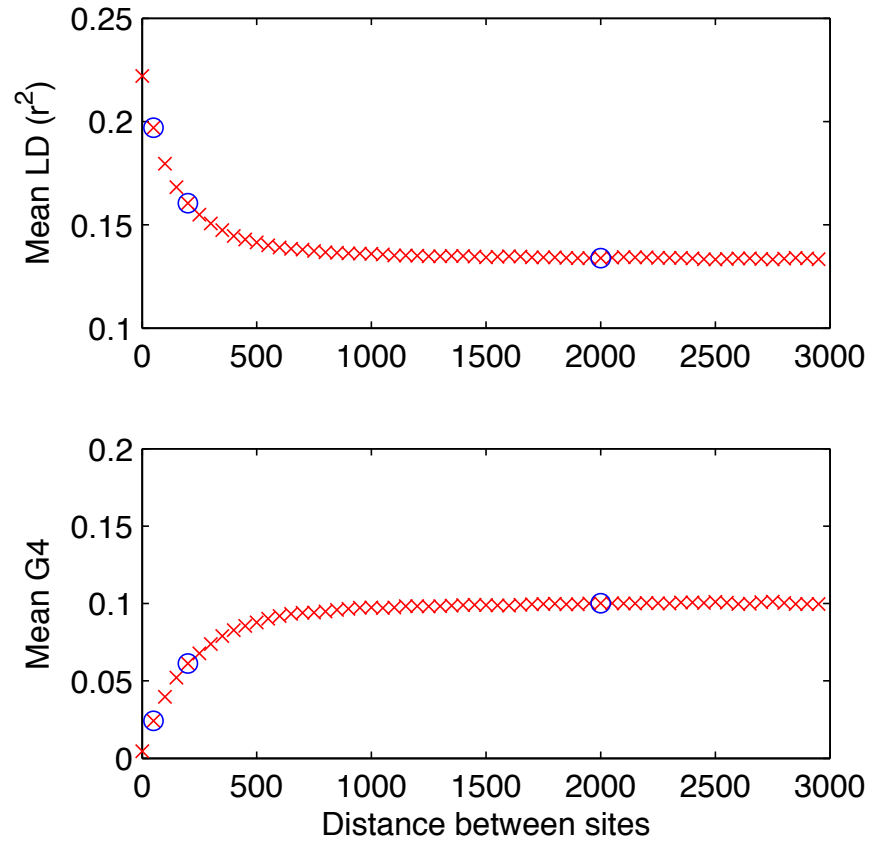

**Figure S5.** LD and G4 plots for the simulated dataset.

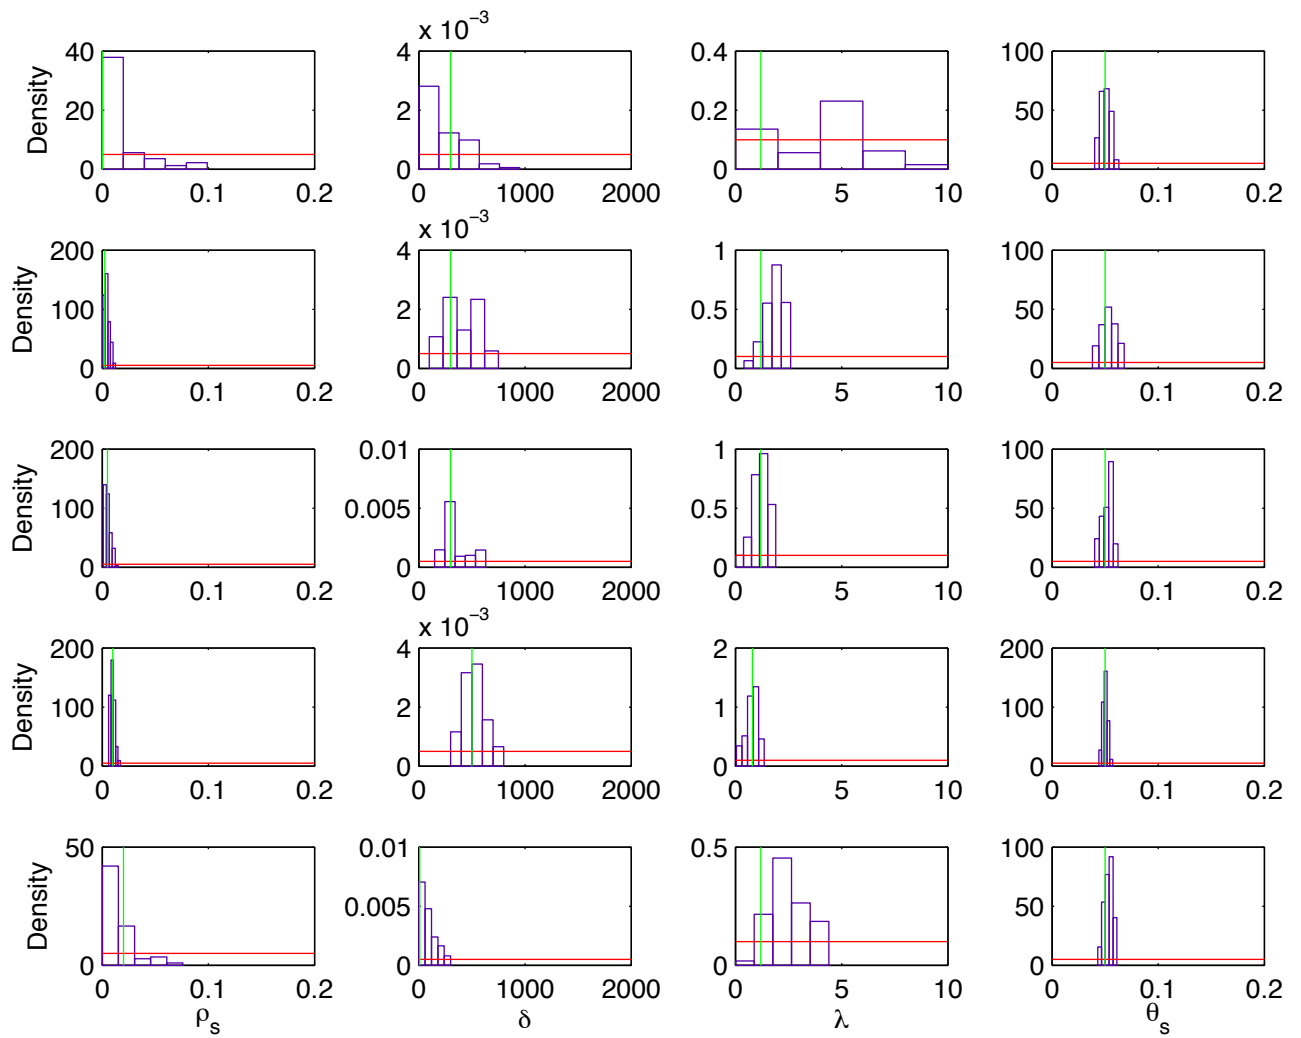

**Figure S6.** Posterior marginal densities for five simulated data sets on a range of parameters. The correct value is in green, the prior in red and the posterior in blue.

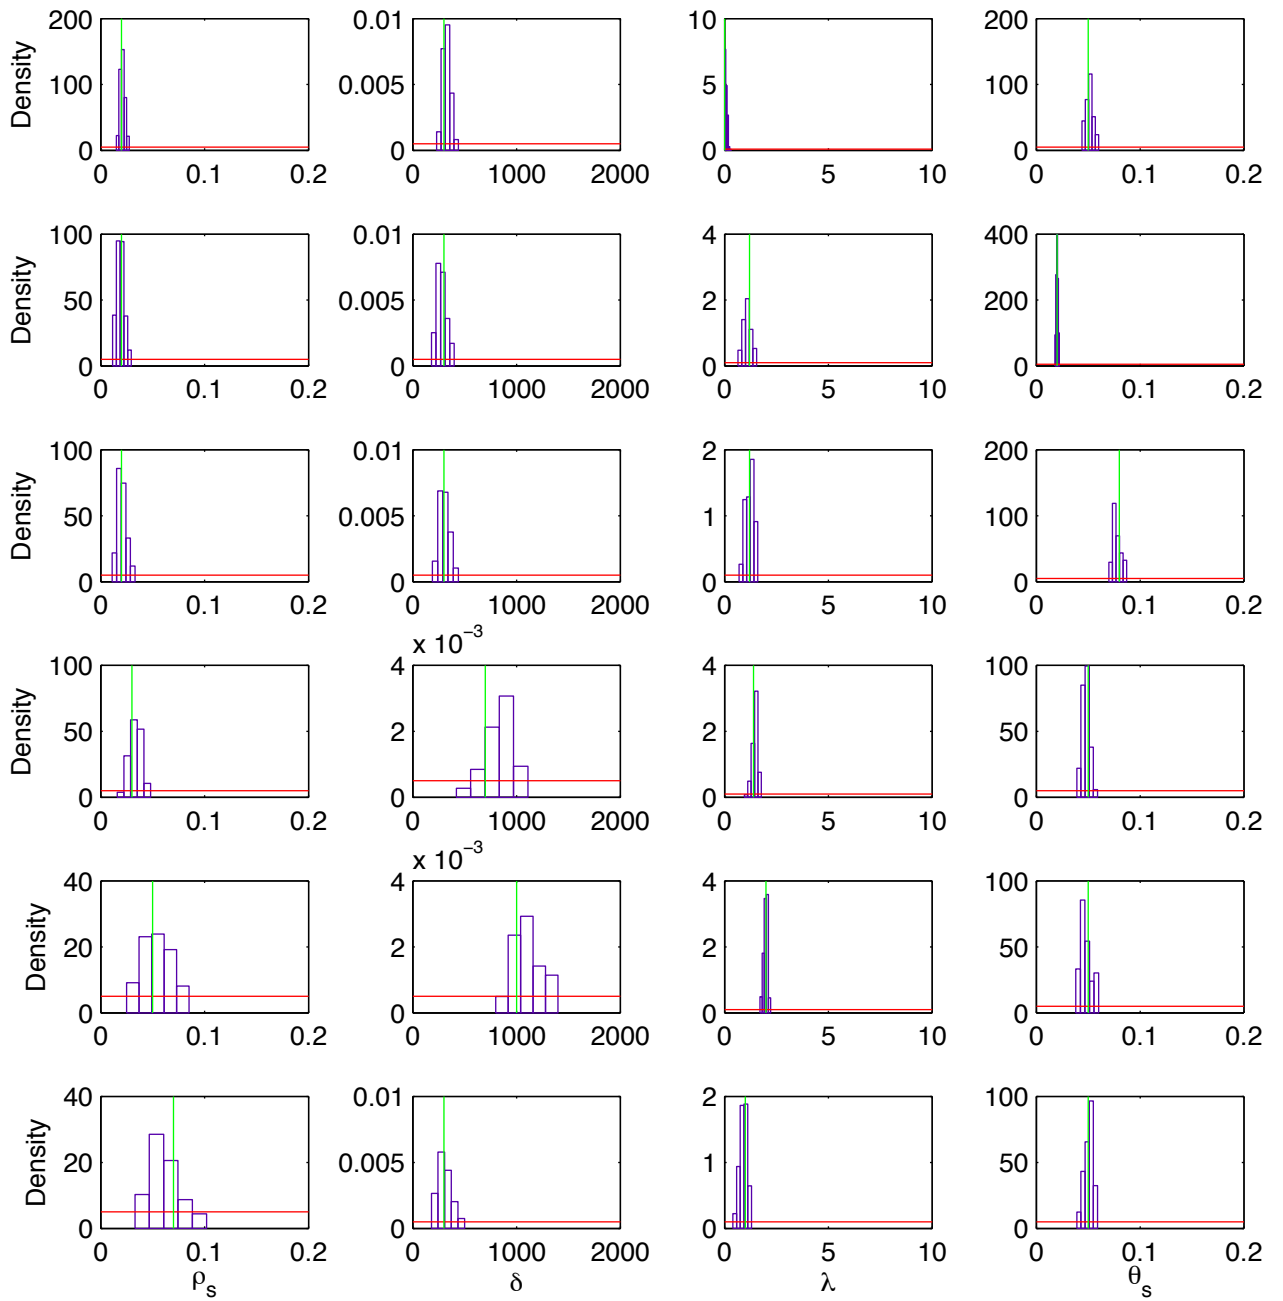

**Figure S7.** Posterior marginal densities for six simulated data sets on a range of parameters. The correct value is in green, the prior in red and the posterior in blue.

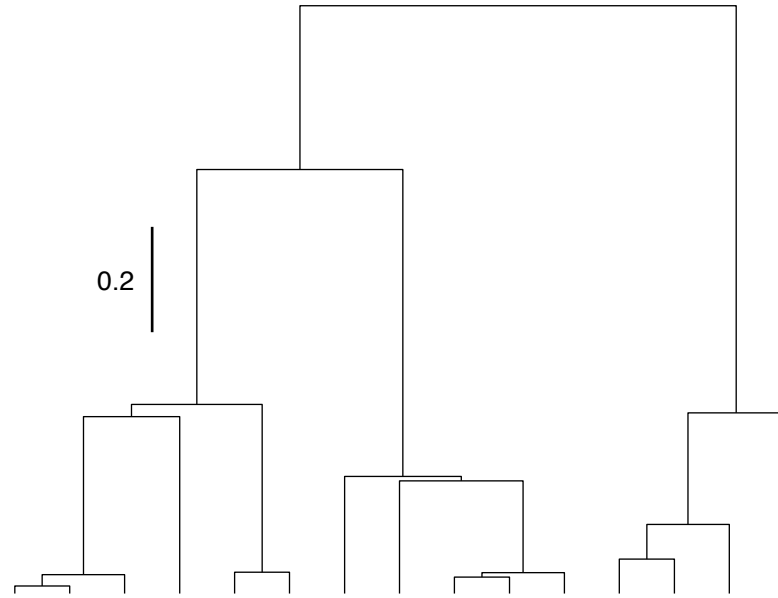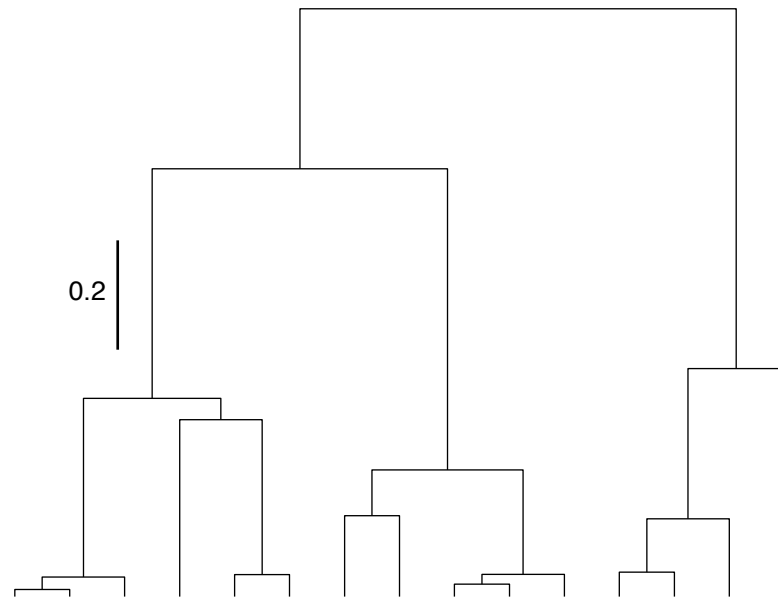

**Figure S8.** The two incorrect clonal genealogies used for testing robustness.



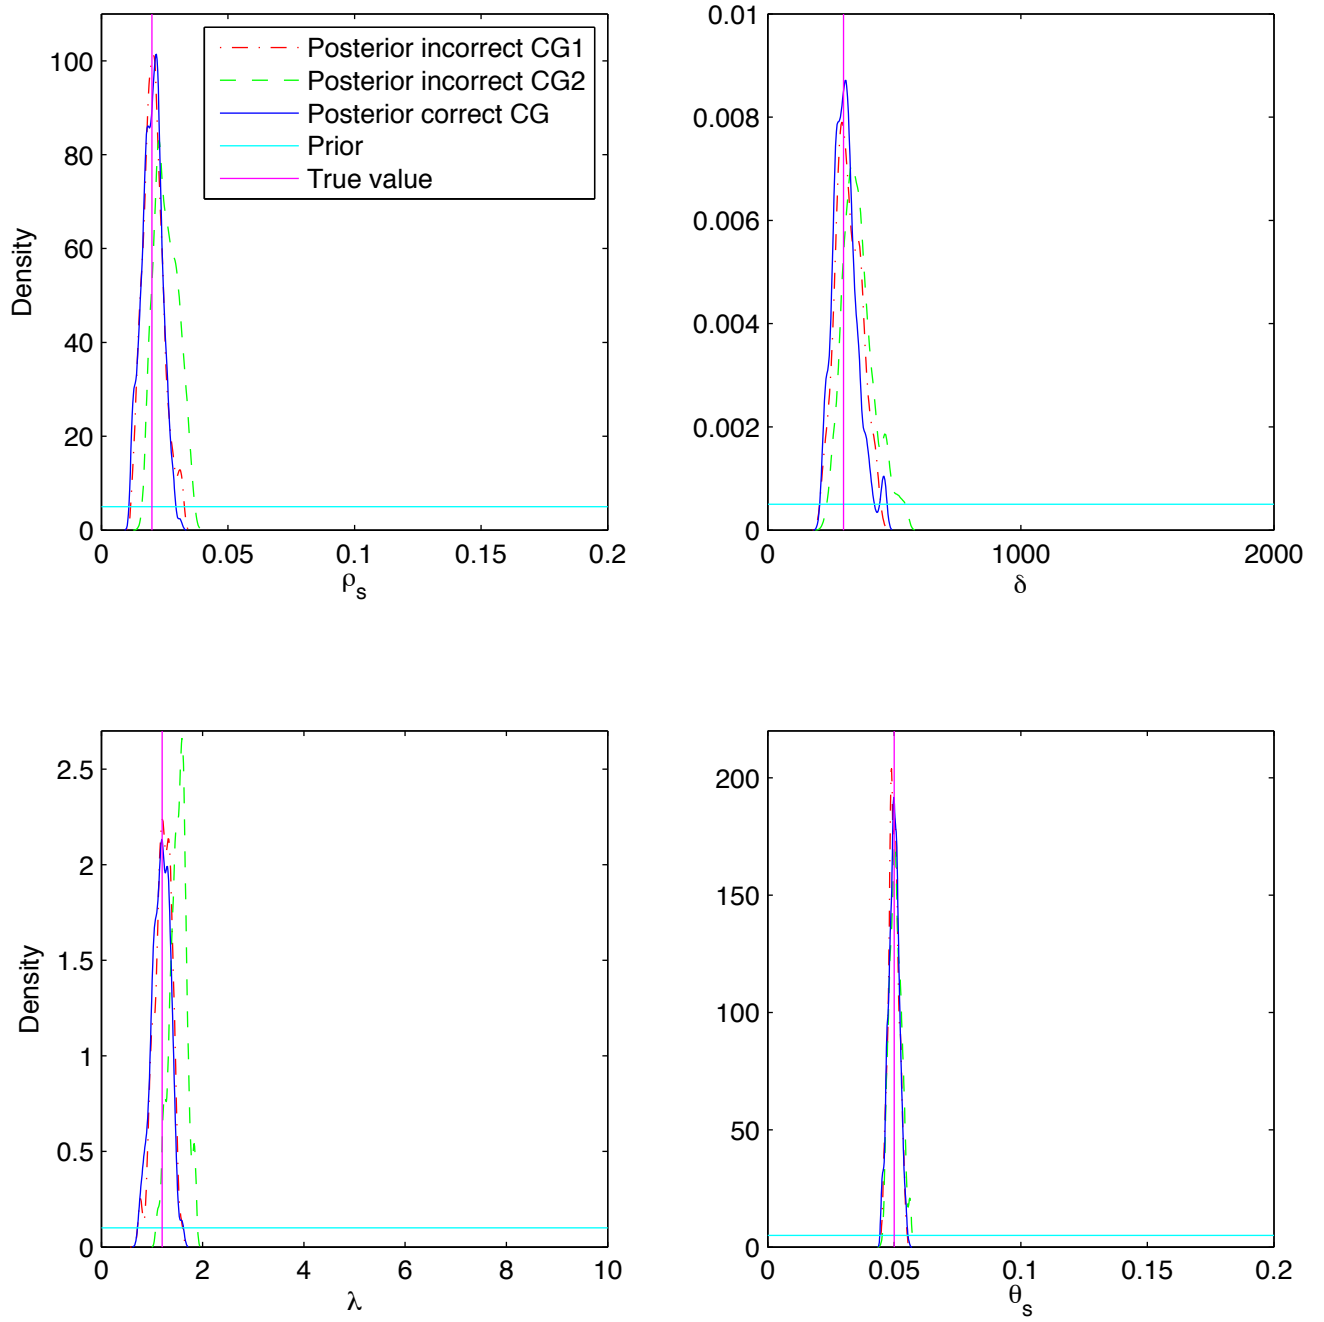

**Figure S9.** Comparison of posterior marginal density obtained using the correct, and the two incorrect clonal genealogies.

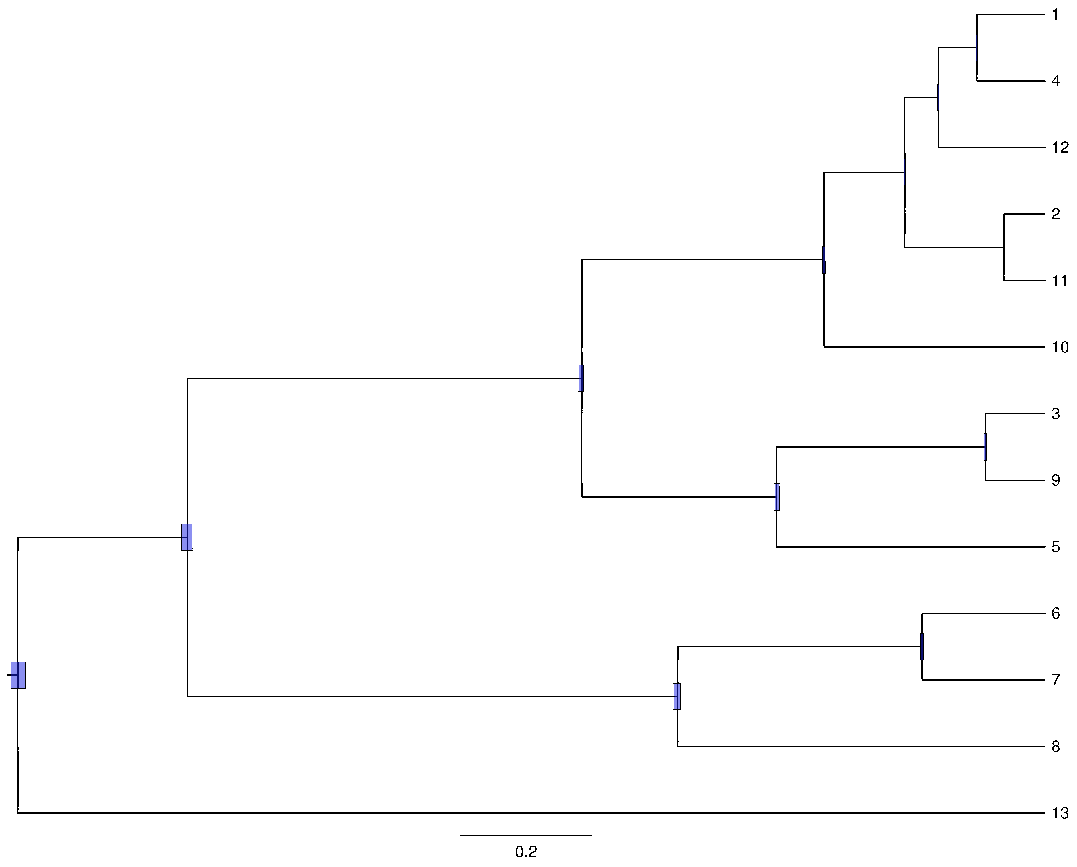

**Figure S10.** Clonal genealogy of the *Bacillus cereus* dataset inferred by ClonalFrame. The blue bars represent the uncertainty on the age of the internal nodes.

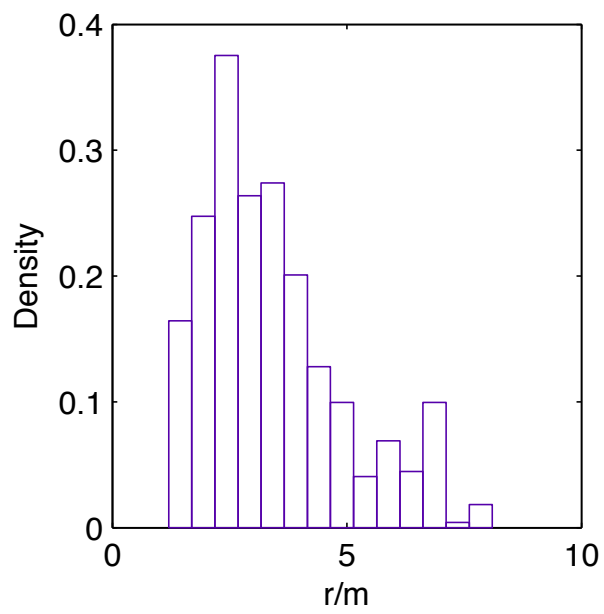

**Figure S11.** Posterior density of  $r/m$  for the *Bacillus cereus* dataset.

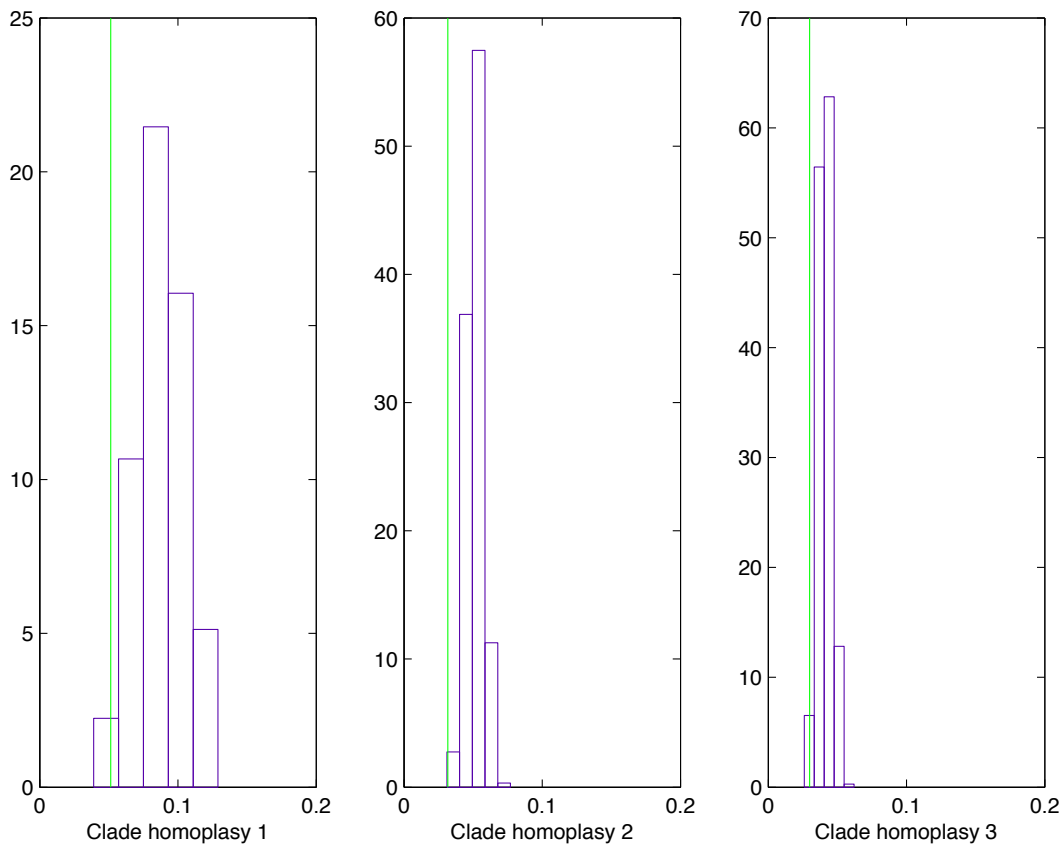

**Figure S12.** Posterior predictive distributions of the three additional summary statistics for the application to the *Bacillus cereus* dataset. The green lines represent the observed values.
