# Supplementary material
Source: PubMed Central journal article supplement (PMC3872189)
Supplement: 9f2c5c2508f2574b1cd5a7c1911ee689_genetics.113.157172-5.pdf [file 9f2c5c2508f2574b1cd5a7c1911ee689_genetics.113.157172-5.pdf]

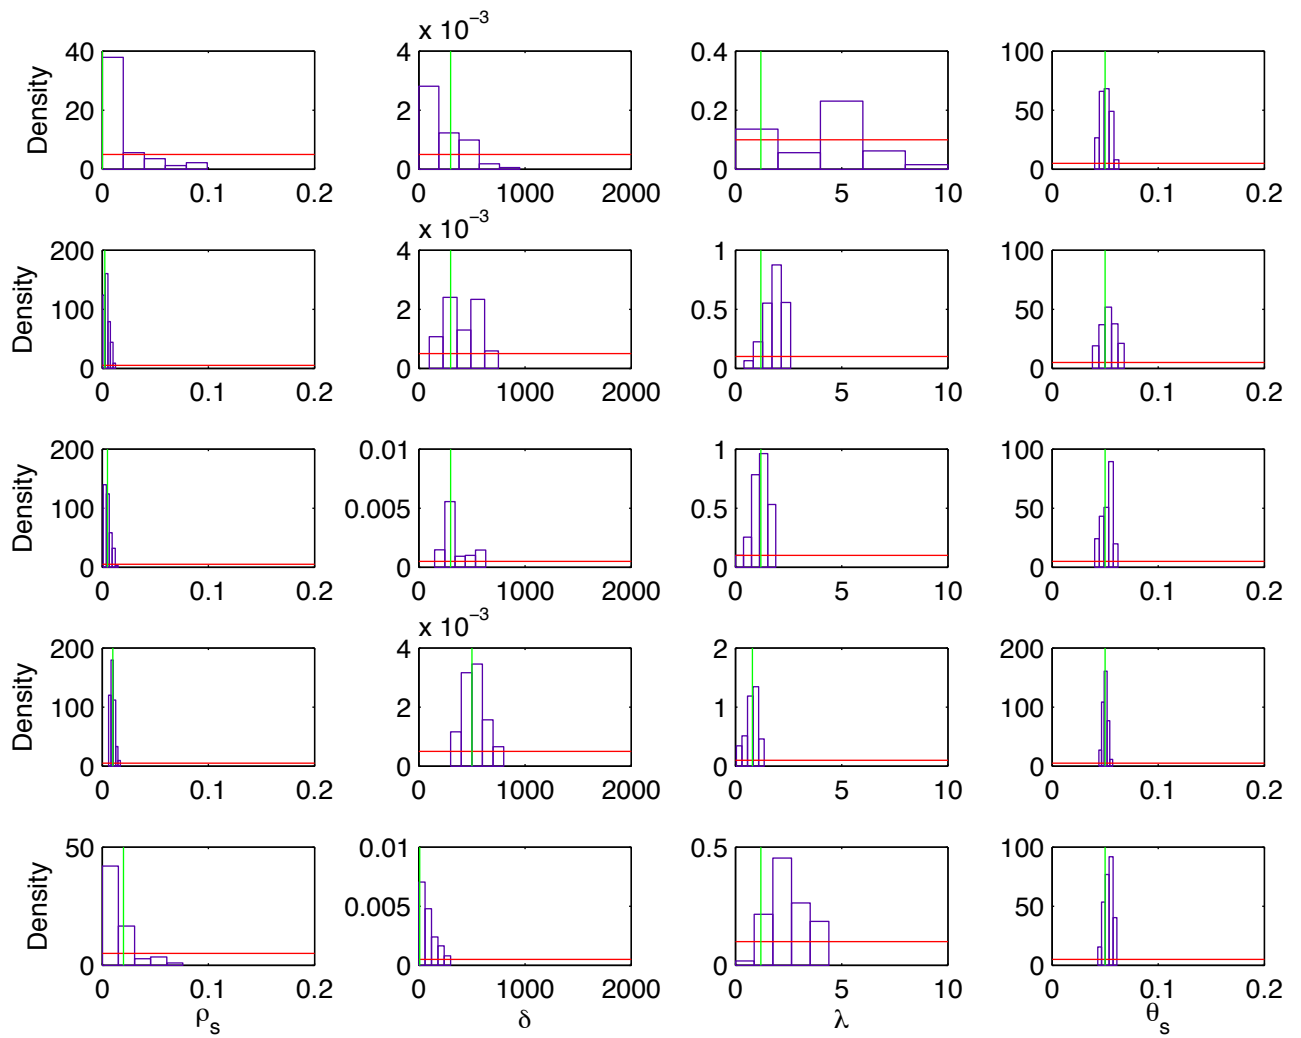

**Figure S6.** Posterior marginal densities for five simulated data sets on a range of parameters. The correct value is in green, the prior in red and the posterior in blue.
