# Supplementary material
Source: PubMed Central journal article supplement (PMC3872189)
Supplement: 65f6c7d168480ca5f88c54847beffb64_genetics.113.157172-9.pdf [file 65f6c7d168480ca5f88c54847beffb64_genetics.113.157172-9.pdf]

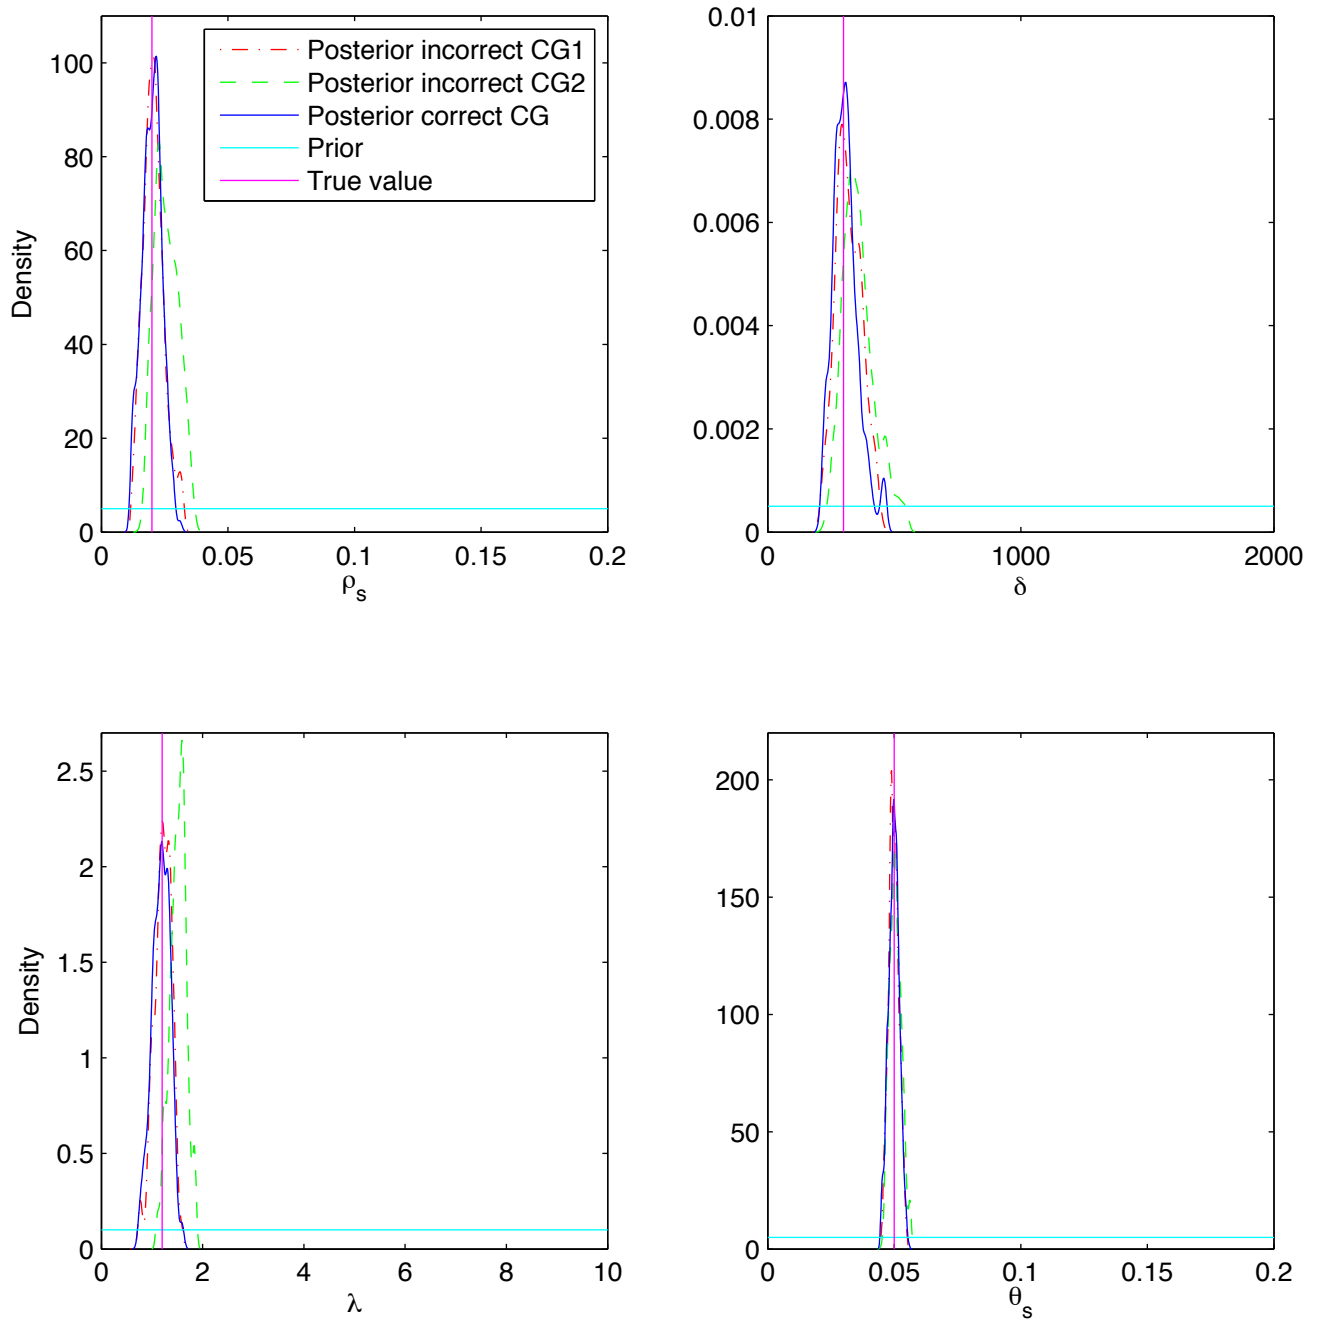

**Figure S9.** Comparison of posterior marginal density obtained using the correct, and the two incorrect clonal genealogies.
