# Supplementary material
Source: PubMed Central journal article supplement (PMC3872189)
Supplement: 248bd9d340711717a1039207beba12e5_genetics.113.157172-13.pdf [file 248bd9d340711717a1039207beba12e5_genetics.113.157172-13.pdf]

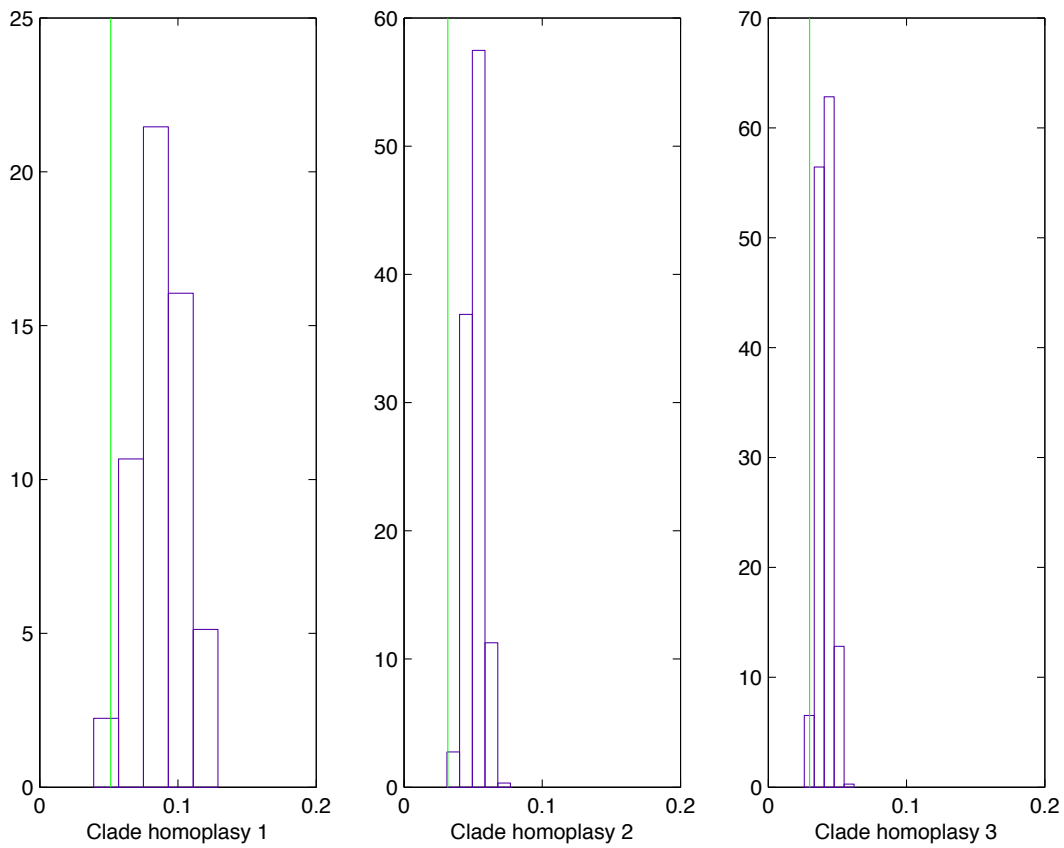

**Figure S12.** Posterior predictive distributions of the three additional summary statistics for the application to the *Bacillus cereus* dataset. The green lines represent the observed values.
