# Supplementary material
Source: PubMed Central journal article supplement (PMC3872189)
Supplement: 652d3ed08200ad011276180a80c66aec_genetics.113.157172-3.pdf [file 652d3ed08200ad011276180a80c66aec_genetics.113.157172-3.pdf]

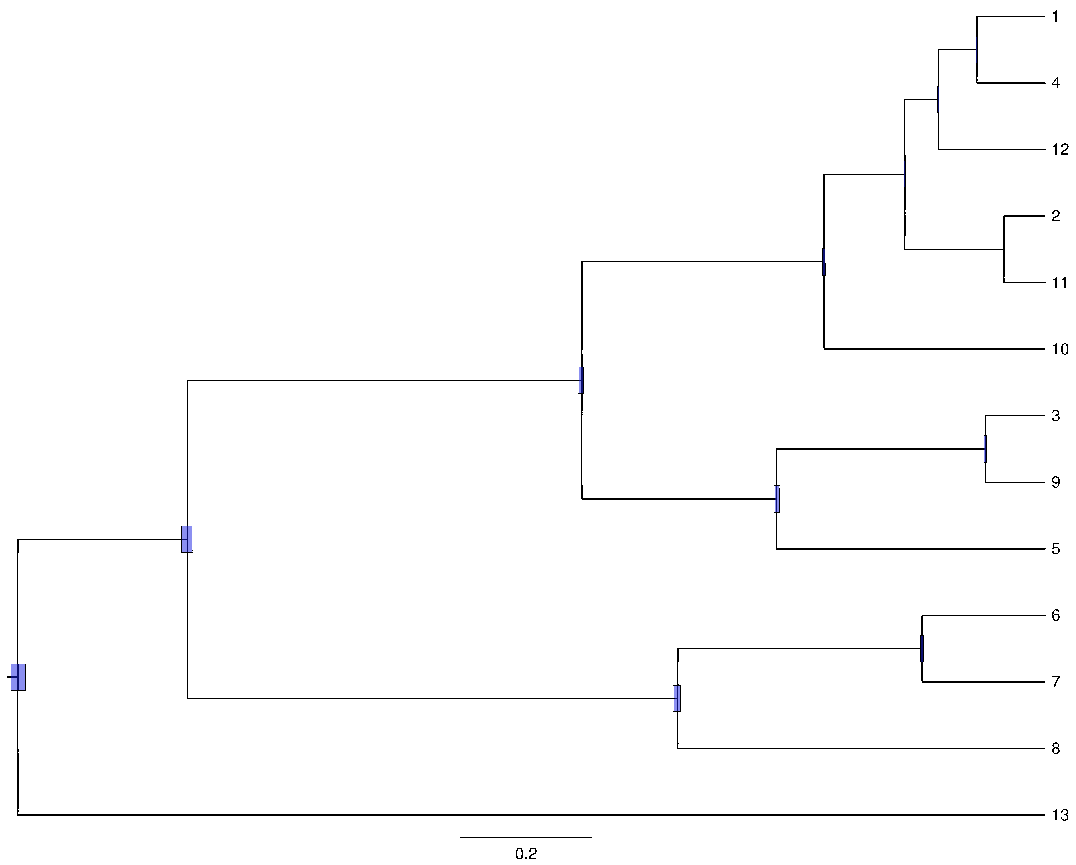

**Figure S10.** Clonal genealogy of the *Bacillus cereus* dataset inferred by ClonalFrame. The blue bars represent the uncertainty on the age of the internal nodes.
