# Supplementary material
Source: PubMed Central journal article supplement (PMC3872189)
Supplement: d84a2366d628aa09e62baedffa8aa67f_genetics.113.157172-10.pdf [file d84a2366d628aa09e62baedffa8aa67f_genetics.113.157172-10.pdf]

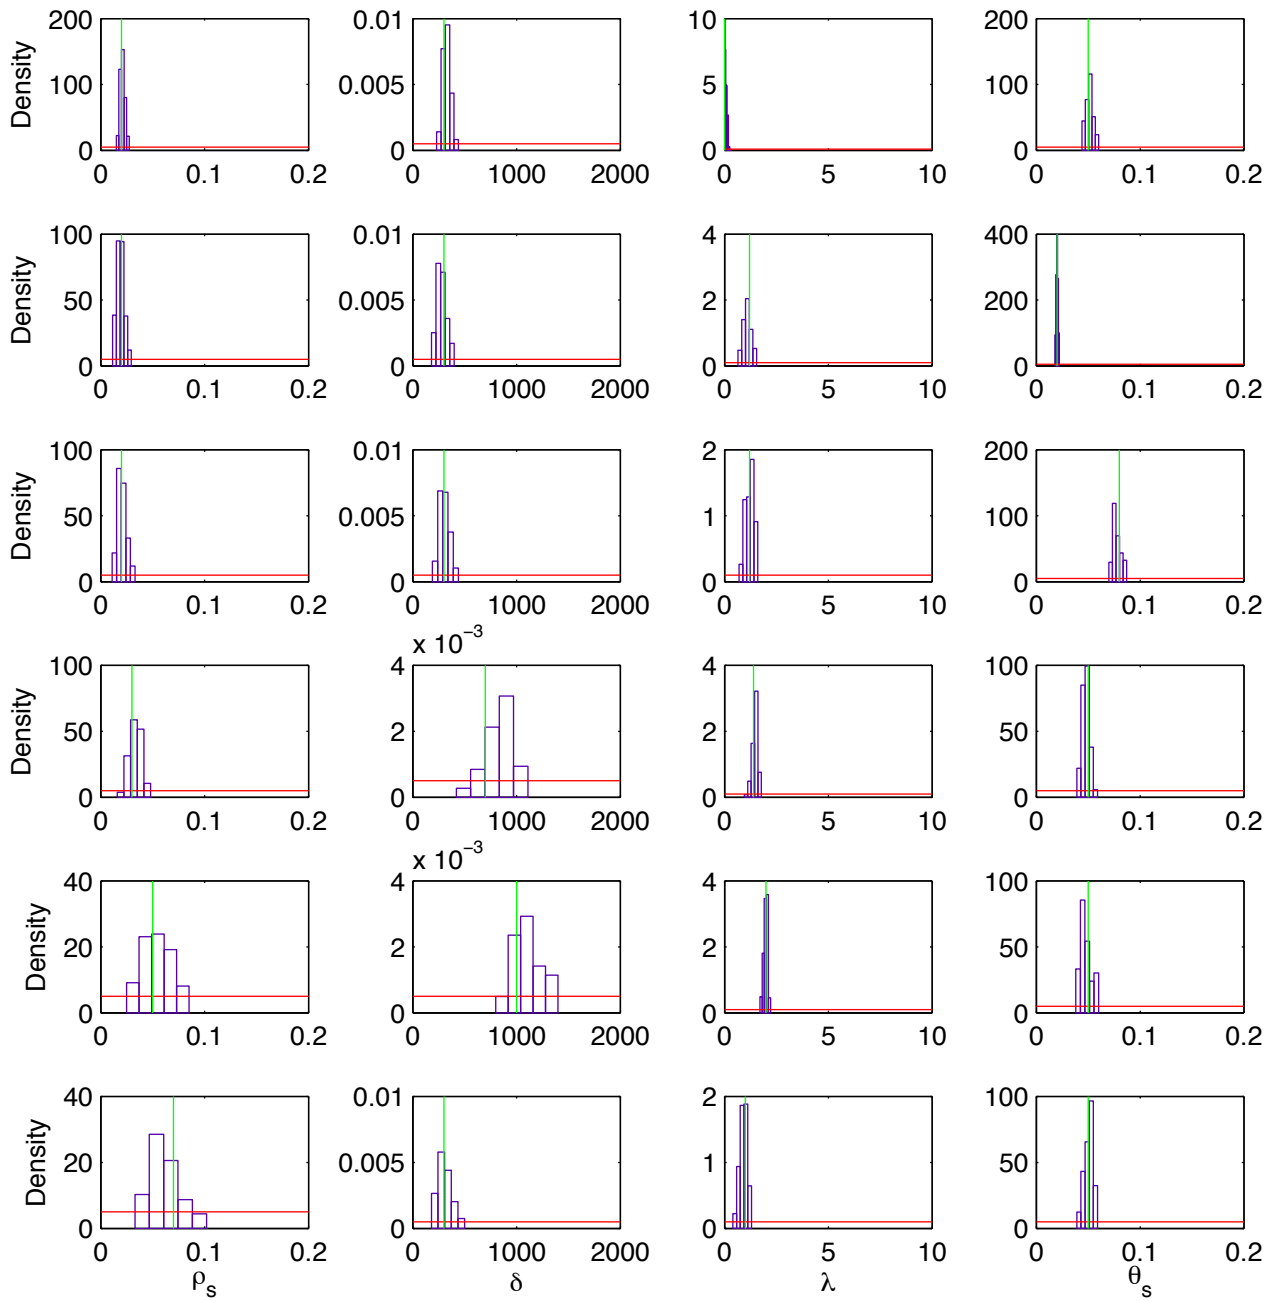

**Figure S7.** Posterior marginal densities for six simulated data sets on a range of parameters. The correct value is in green, the prior in red and the posterior in blue.
