# Supplementary material
Source: PubMed Central journal article supplement (PMC3872189)
Supplement: e40f54bfbd26a97ea99ae69b225a0778_genetics.113.157172-1.pdf [file e40f54bfbd26a97ea99ae69b225a0778_genetics.113.157172-1.pdf]

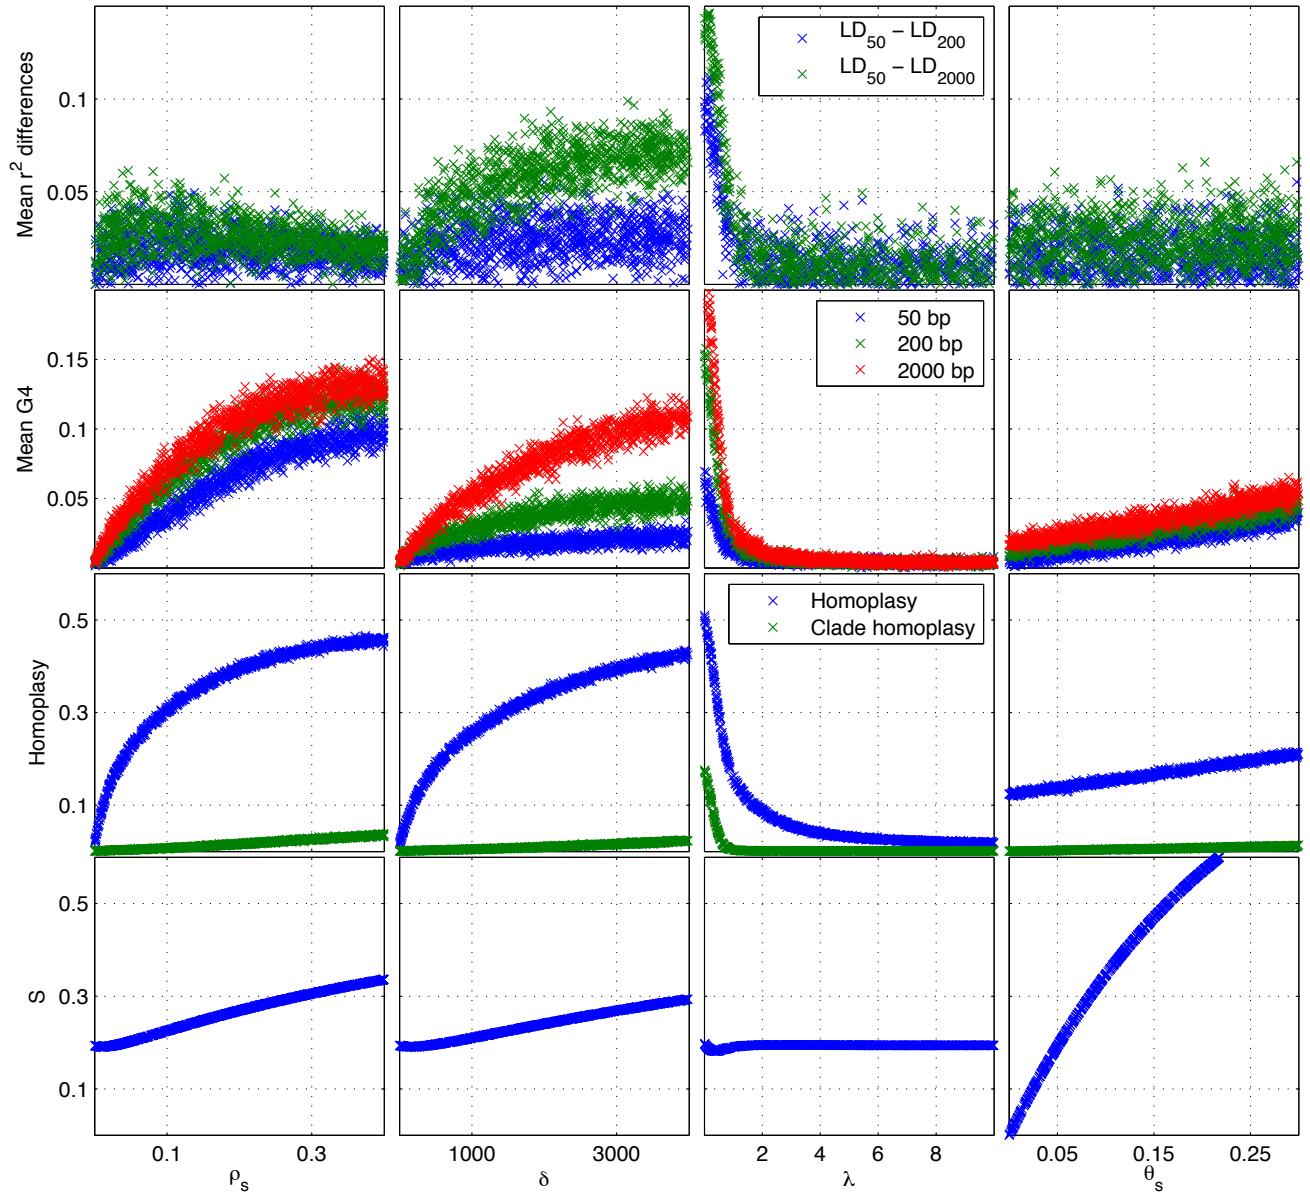

**Figure S3.** Relationship between the summary statistics and model parameters when simulating using the clonal genealogy in Figure S2.
