# Supplementary material
Source: PubMed Central journal article supplement (PMC3872189)

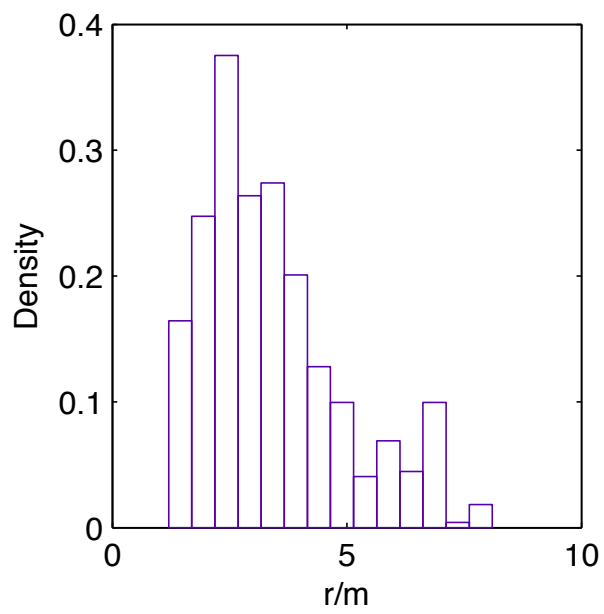

**Figure S11.** Posterior density of  $r/m$  for the *Bacillus cereus* dataset.

Supplement: 08af98e487196a8c79792d5ae4082e36_genetics.113.157172-7.pdf [file 08af98e487196a8c79792d5ae4082e36_genetics.113.157172-7.pdf]

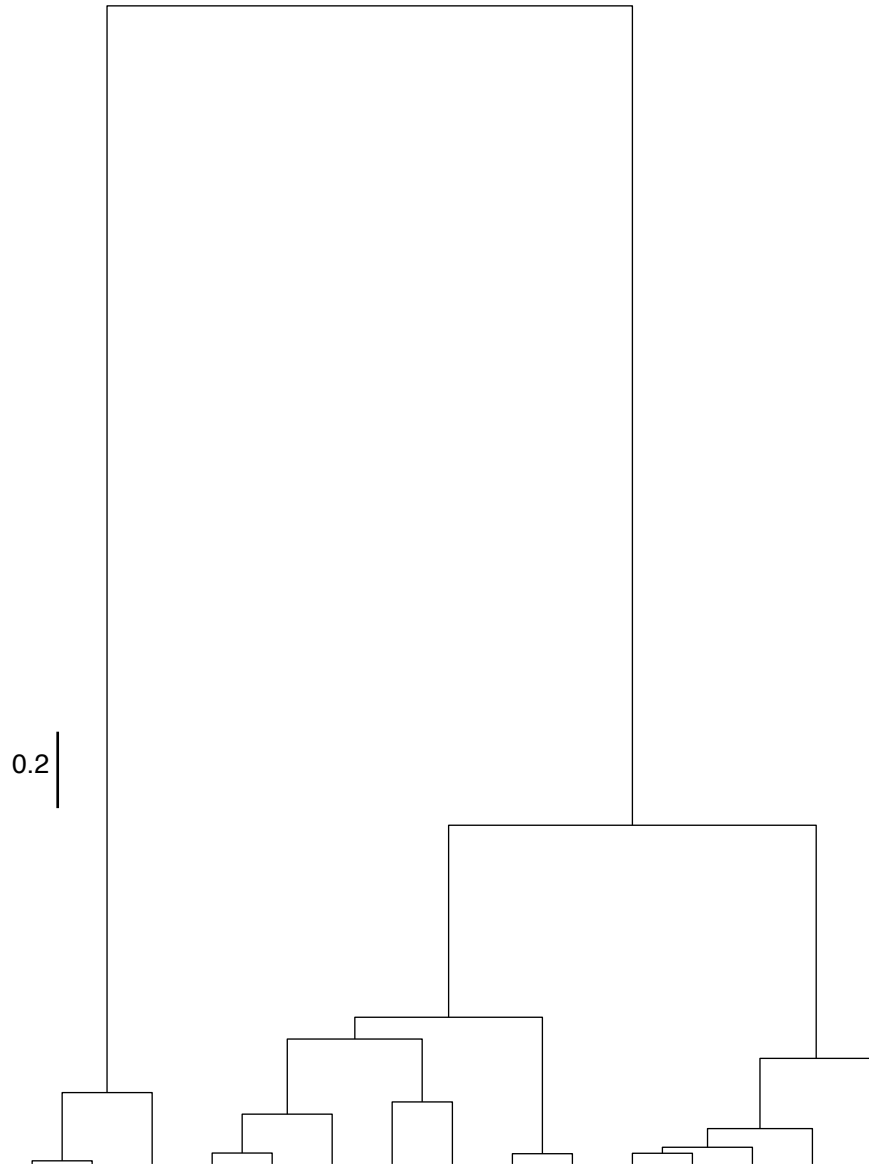

**Figure S2.** Clonal genealogy simulated under the coalescent and used for Figure S3.

Supplement: 0c360160ef1cdcaafa4bbc58207a3855_genetics.113.157172-8.pdf [file 0c360160ef1cdcaafa4bbc58207a3855_genetics.113.157172-8.pdf]

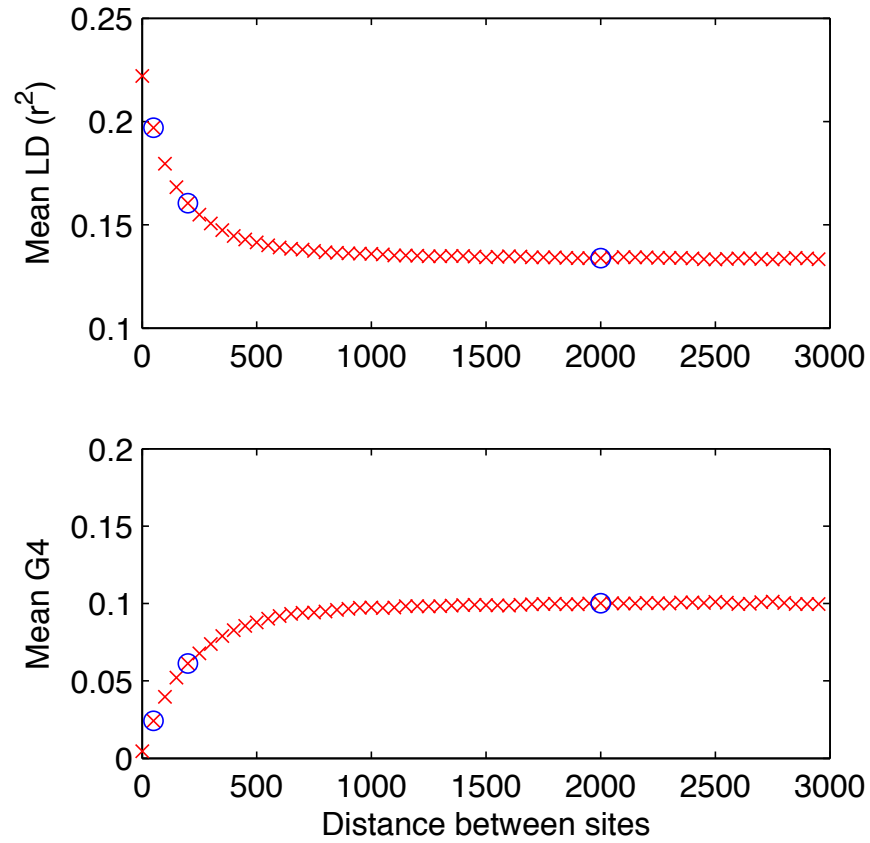

**Figure S5.** LD and G4 plots for the simulated dataset.

Supplement: 3a51d78a5f79519ba97cc6f2487786d9_genetics.113.157172-12.pdf [file 3a51d78a5f79519ba97cc6f2487786d9_genetics.113.157172-12.pdf]

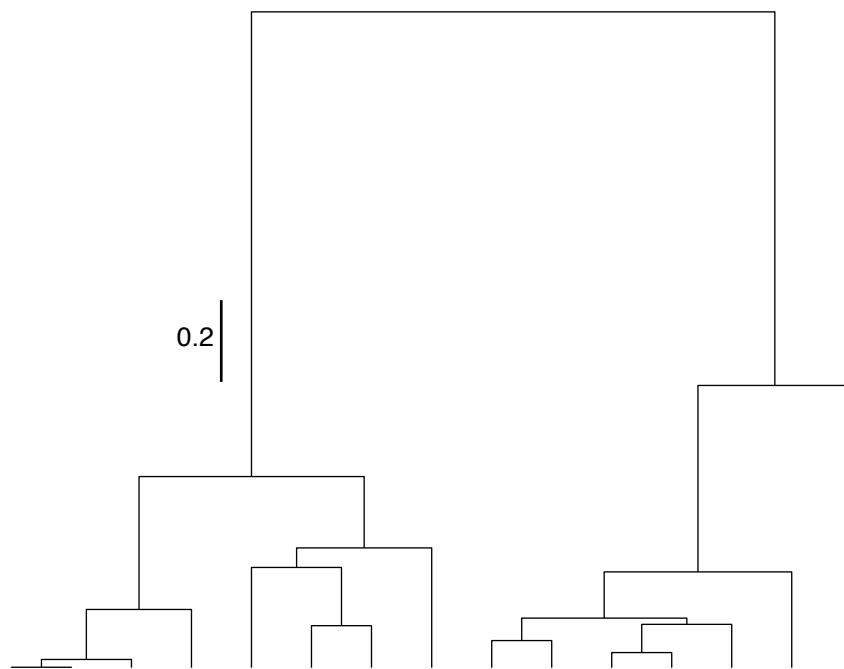

**Figure S1.** Clonal genealogy simulated under the coalescent and used for Figure 3.

Supplement: 61440068e8fa89add6244363e47748b8_genetics.113.157172-4.pdf [file 61440068e8fa89add6244363e47748b8_genetics.113.157172-4.pdf]

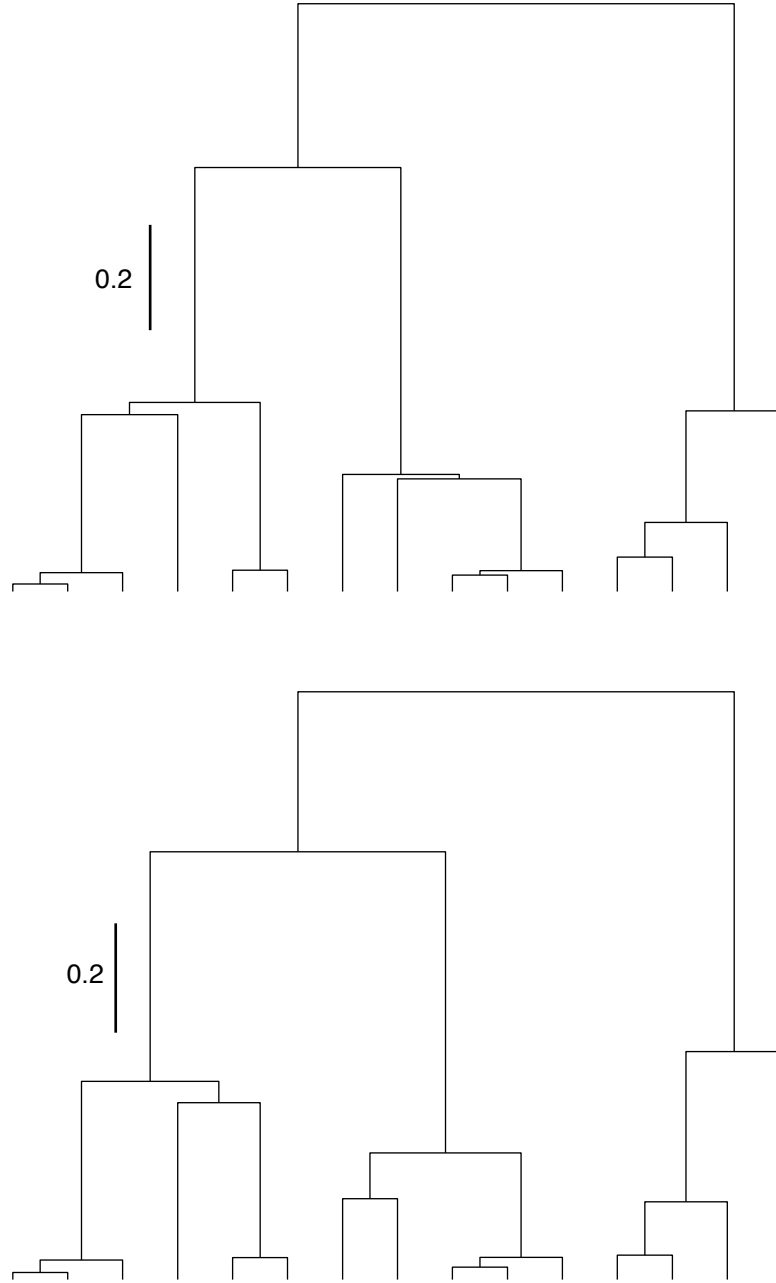

**Figure S8.** The two incorrect clonal genealogies used for testing robustness.

Supplement: 8643f9303a70707555c81d5ab9fffdfd_genetics.113.157172-2.pdf [file 8643f9303a70707555c81d5ab9fffdfd_genetics.113.157172-2.pdf]
